# Supplementary material for: Integrated Metabolomics and Transcriptomics Reveal Metabolic Patterns in Retina of STZ-Induced Diabetic Retinopathy Mouse Model
Source: MDPI journal article supplement (doi:10.3390/metabo12121245), 2022-12-09
Supplement: s1 [file s1]

**Table S1.** Summary table of key abnormal biochemical changes and morphological changes

| Category     | Name                      | Fold change (STZ vs Con) | <i>P</i> value |
|--------------|---------------------------|--------------------------|----------------|
| Metabolites  | Glucose                   | 1.212                    | 0.012          |
|              | Glucose 6-phosphate       | 5.000                    | 0.005          |
|              | Fructose 6-phosphate      | 3.001                    | 0.0004         |
|              | Fructose 1, 6-diphosphate | 2.132                    | 0.036          |
|              | Ornithine                 | 1.470                    | 0.049          |
|              | Proline                   | 0.830                    | 0.004          |
|              | Arginine                  | 0.947                    | 0.526          |
|              | Leucine                   | 1.335                    | 0.0006         |
|              | Isoleucine                | 1.453                    | 0.0001         |
|              | Valine                    | 1.354                    | 0.072          |
|              | Tryptophan                | 0.633                    | 0.0006         |
|              | Kynurenine                | 0.913                    | 0.955          |
| Enzyme genes | Hk2                       | 0.750                    | 0.00009        |
|              | Nos2                      | 3.660                    | 0.017          |
|              | Slc7a5                    | 1.390                    | 3.805E-08      |
|              | Aldh1a3                   | 4.900                    | 0.006          |
|              | Tph2                      | 0.530                    | 0.00004        |
|              | Cyp26b1                   | 0.520                    | 7.444E-07      |
| OCT          | Inner retina thickness    | 0.889                    | <0.05          |

STZ, streptozotocin; Con, control; OCT, optical coherence tomography
